# Supplementary material for: Predicting long-term outcomes in acute intracerebral haemorrhage using delayed prognostication scores
Source: HighWire-hosted journal article supplement (doi:10.1136/svn-2020-000656), 2021-03-23
Supplement: svn-2020-000656supp001_data_supplement.pdf [file svn-2020-000656supp001_data_supplement.pdf]

**PREDICTING LONG-TERM OUTCOMES IN ACUTE INTRACEREBRAL HEMORRHAGE USING DELAYED  
PROGNOSTICATION SCORES – Supplemental Material**

Number of Figures: 4

Number of Tables: 9

**Figure I.** Histogram of the distribution of baseline vs delayed scores for a) ICH score, b) modified-ICH score, c) max-ICH score, and d) FUNC score.

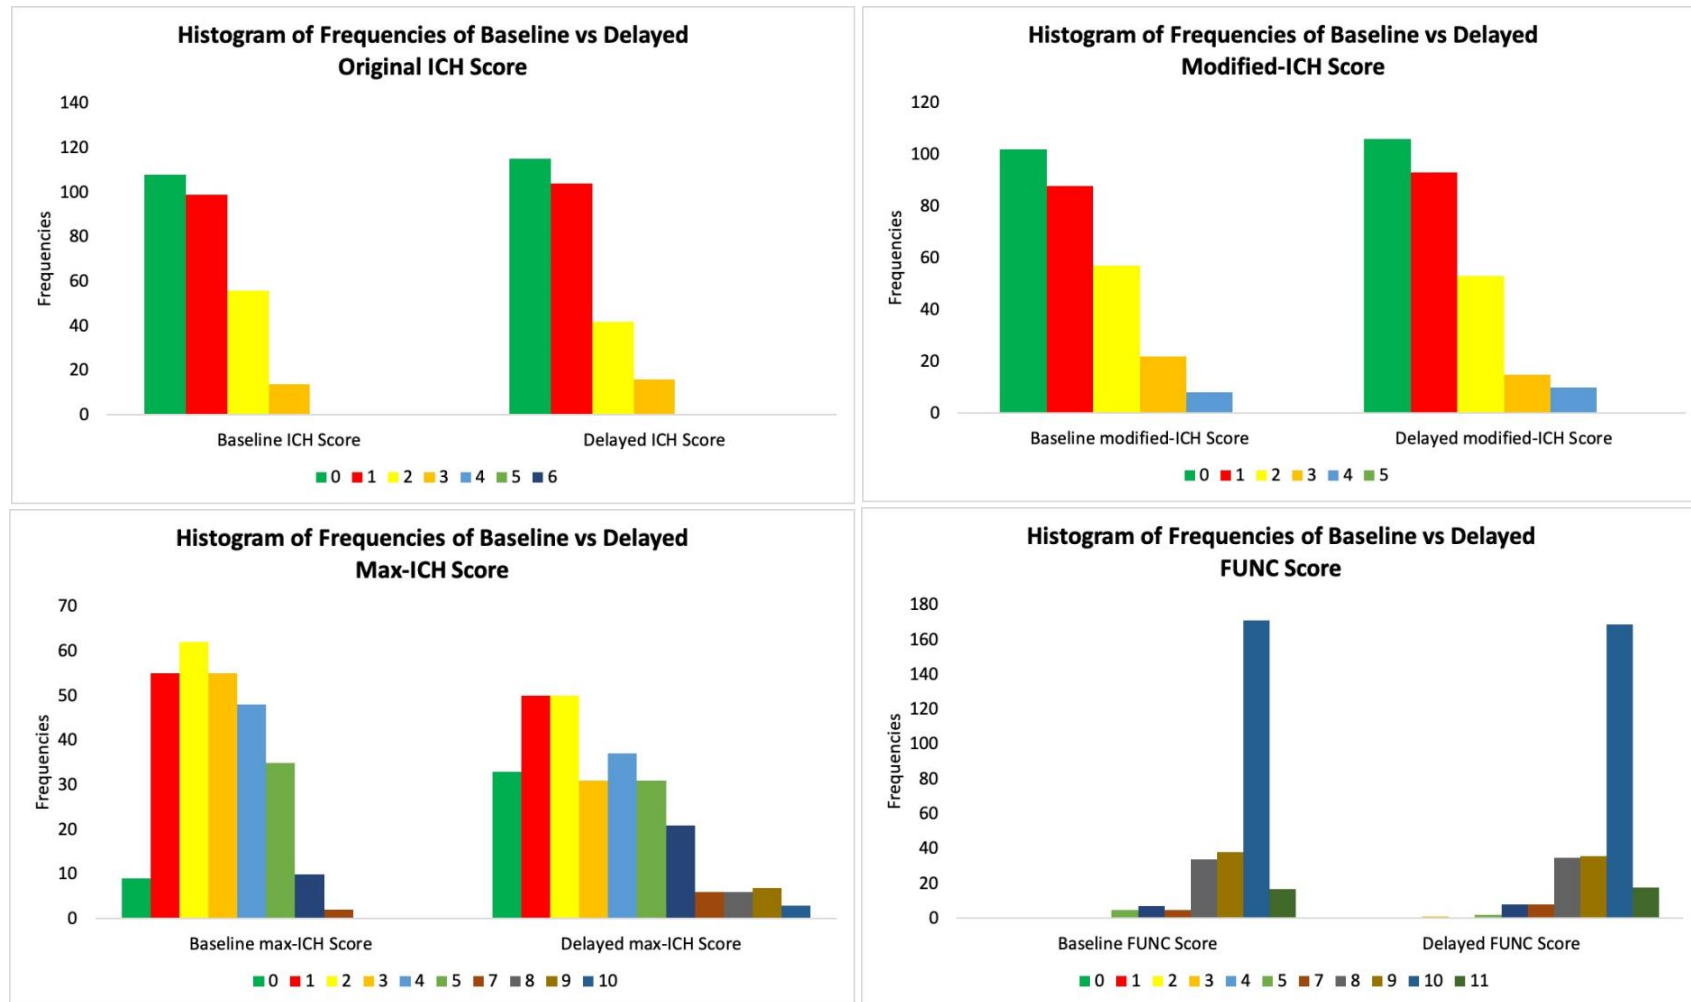

**Figure II.** ROC curves for the association between baseline and delayed modified-ICH (MICH) score for 30-day, 90-day, and 180-day mortality (top row), and 30-day, 90-day, and 180-day poor functional outcome, defined as mRS 4-5 (bottom row).

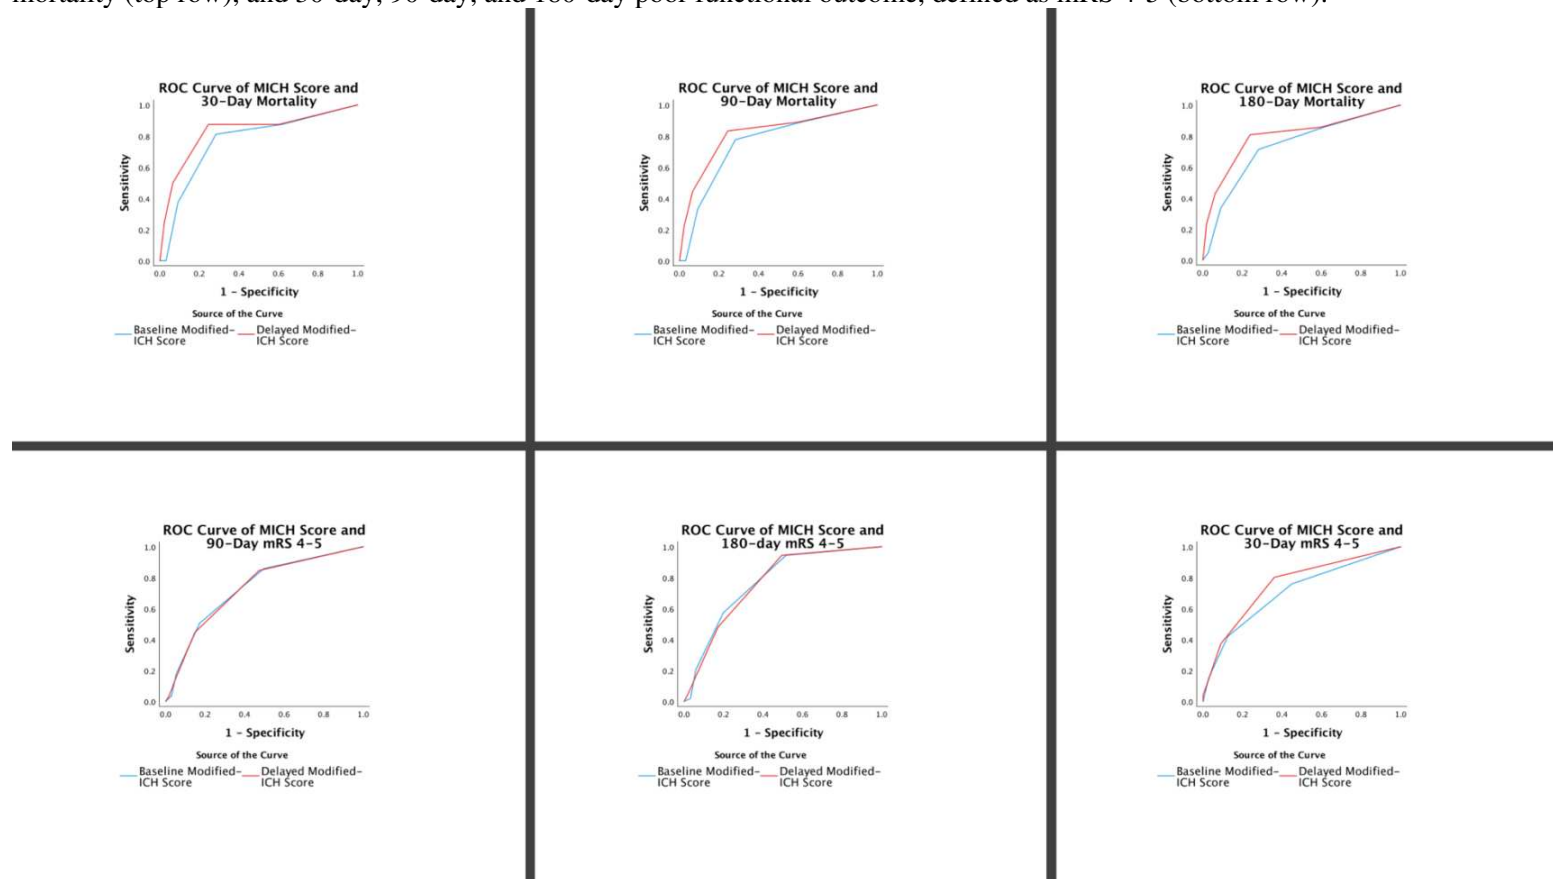

**Figure III.** ROC curves for the association between baseline and delayed max-ICH score for 30-day, 90-day, and 180-day mortality (top row), and 30-day, 90-day, and 180-day poor functional outcome, defined as mRS 4-5 (bottom row).

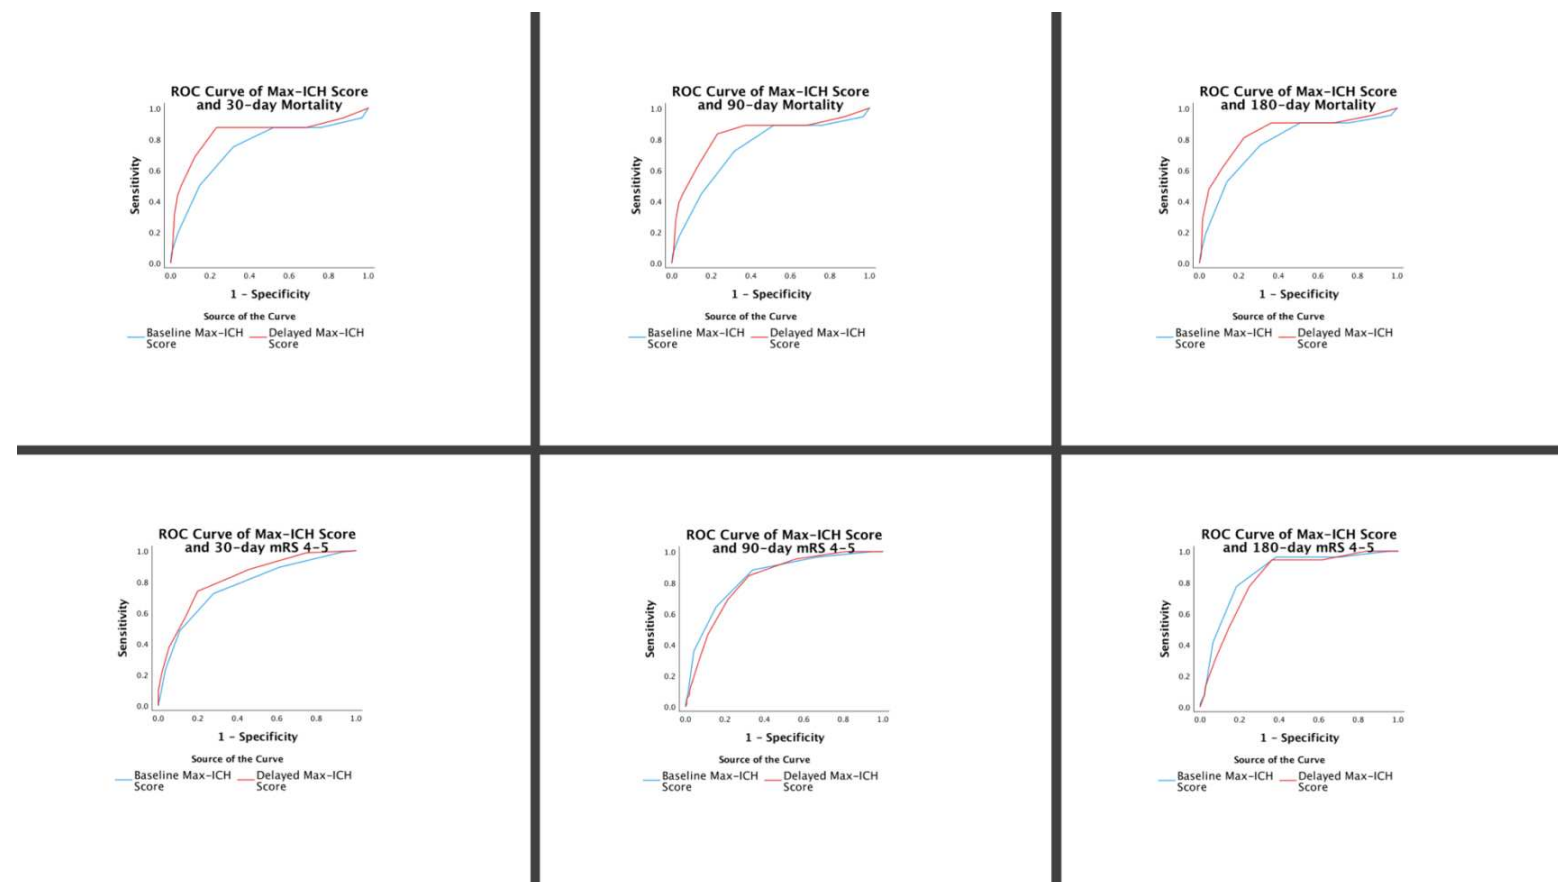

**Figure IV.** ROC curves for the association between baseline and delayed FUNC score for 30-day, 90-day, and 180-day mortality (top row), and 30-day, 90-day, and 180-day poor functional outcome, defined as mRS 4-5 (bottom row).

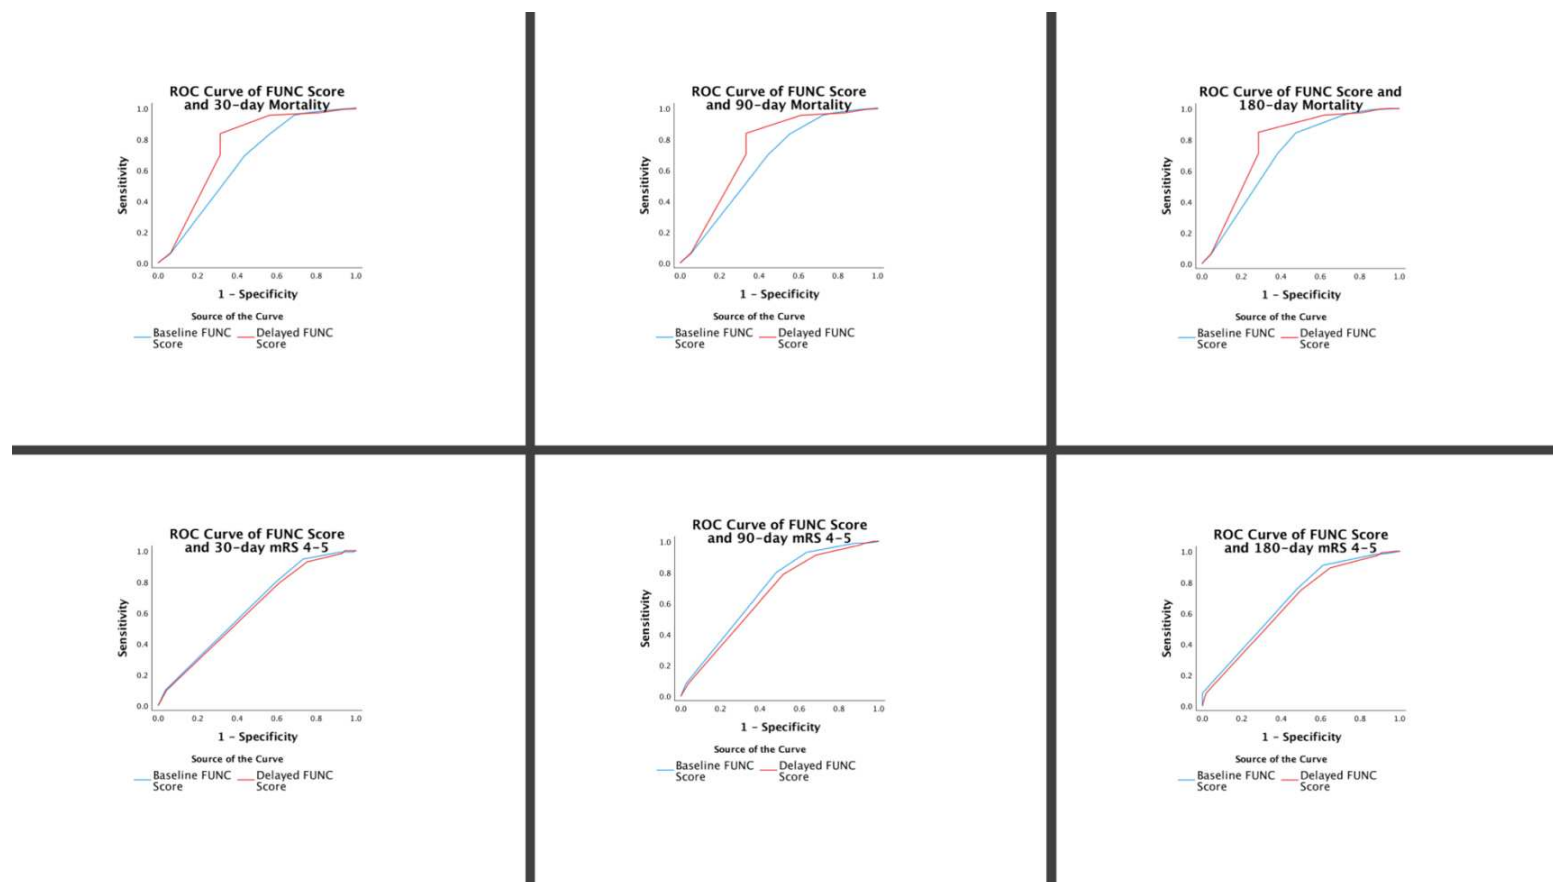

**Table 1.** Area under the curve (AUC) values for ROC curves of baseline vs delayed prognostication scores (listed left) for 30, 90, and 180-day mortality and poor functional outcome (defined as mRS of 4-5) in **placebo** treated patients meeting inclusion criteria. Statistical significance is highlighted using bold-font. P-values are represented in parentheses.

|                                               | Mortality (baseline vs delayed) |                     |                     | Poor Functional Outcome (baseline vs delayed) |              |              |
|-----------------------------------------------|---------------------------------|---------------------|---------------------|-----------------------------------------------|--------------|--------------|
|                                               | 30-day                          | 90-day              | 180-day             | 30-day                                        | 90-day       | 180-day      |
| Original ICH Score<br>(N = 157 for mortality) | <b>0.71 vs 0.84</b>             | <b>0.69 vs 0.85</b> | <b>0.73 vs 0.87</b> | 0.71 vs 0.75                                  | 0.70 vs 0.69 | 0.78 vs 0.75 |
| Modified ICH Score (N = 157 for mortality)    | 0.75 vs 0.83                    | 0.72 vs 0.83        | 0.75 vs 0.85        | 0.72 vs 0.77                                  | 0.72 vs 0.71 | 0.77 vs 0.74 |
| Max ICH Score (N = 157 for mortality)         | <b>0.74 vs 0.83</b>             | <b>0.72 vs 0.83</b> | <b>0.75 vs 0.85</b> | 0.78 vs 0.81                                  | 0.81 vs 0.77 | 0.89 vs 0.83 |
| FUNC Score (N = 158 for mortality)            | 0.67 vs 0.76                    | 0.69 vs 0.77        | 0.73 vs 0.80        | 0.57 vs 0.55                                  | 0.61 vs 0.55 | 0.64 vs 0.59 |

**Table II.** Area under the curve (AUC) values for ROC curves of baseline vs delayed prognostication scores (listed left) for 30, 90, and 180-day mortality and poor functional outcome in **Deferoxamine** treated patients meeting inclusion criteria. Statistical significance is highlighted using bold-font. P-values are represented in parentheses.

|                                            | Mortality (baseline vs delayed) |                     |              | Poor Functional Outcome (baseline vs delayed) |              |              |
|--------------------------------------------|---------------------------------|---------------------|--------------|-----------------------------------------------|--------------|--------------|
|                                            | 30-day                          | 90-day              | 180-day      | 30-day                                        | 90-day       | 180-day      |
| Original ICH Score (N = 141 for mortality) | 0.76 vs 0.81                    | 0.77 vs 0.80        | 0.75 vs 0.80 | 0.69 vs 0.72                                  | 0.78 vs 0.75 | 0.79 vs 0.79 |
| Modified ICH Score (N = 141 for mortality) | 0.79 vs 0.83                    | 0.80 vs 0.80        | 0.73 vs 0.76 | 0.68 vs 0.73                                  | 0.74 vs 0.75 | 0.76 vs 0.79 |
| Max ICH Score (N = 140 for mortality)      | <b>0.74 vs 0.83</b>             | <b>0.75 vs 0.82</b> | 0.78 vs 0.82 | <b>0.76 vs 0.83</b>                           | 0.86 vs 0.85 | 0.82 vs 0.81 |
| FUNC Score (N = 141 for mortality)         | 0.65 vs 0.74                    | 0.62 vs 0.70        | 0.68 vs 0.74 | 0.69 vs 0.68                                  | 0.77 vs 0.76 | 0.73 vs 0.73 |

**Table III:** Delayed ICH scores and their interaction with treatment effect on poor functional outcome (defined as mRS = 4-5) at various time-points.

|          | ICH Score x Treatment interaction         | FUNC Score x Treatment interaction | MICH x Treatment interaction         | Max-ICH x Treatment interaction           |
|----------|-------------------------------------------|------------------------------------|--------------------------------------|-------------------------------------------|
| mRS 30d  | OR 0.72 (95% CI 0.31 – 1.66)<br>P = 0.441 | OR 1.92 (1.05 – 3.49)<br>P = 0.034 | OR 0.715 (0.331 – 1.55)<br>P = 0.394 | OR 1.02 (95% CI 0.69 – 1.52)<br>P = 0.909 |
| mRS 90d  | OR 1.28 (95% CI 0.62 – 2.62)<br>P = 0.502 | OR 2.59 (1.45 – 4.67)<br>P = 0.001 | OR 1.22 (0.66 – 2.25)<br>P = 0.524   | OR 1.27 (95% CI 0.90 – 1.78)<br>P = 0.176 |
| mRS 180d | OR 1.09 (95% CI 0.49 – 2.45)<br>P = 0.827 | OR 2.0 (1.09 – 3.7)<br>P = 0.024   | OR 1.33 (0.676 – 2.62)<br>P = 0.408  | OR 0.97 (95% CI 0.68 – 1.39)<br>P = 0.883 |

**Sensitivity Analyses based on Sex and Race**

**Table IV:** Frequency of outcomes of interest, stratified by sex. Statistically significant results are highlighted with bold-font. Frequency of poor functional outcomes is calculated out of survivors only.

| <b>Outcome Variable</b>                                | <b>Male (n=169)</b> | <b>Female (n=108)</b> | <b>P Value</b> |
|--------------------------------------------------------|---------------------|-----------------------|----------------|
| 30-day mortality (n, %)                                | 10 (5.9%)           | 6 (5.6%)              | 0.90           |
| 90-day mortality (n, %)                                | 11 (6.5%)           | 7 (6.5%)              | 0.99           |
| 180-day mortality (n, %)                               | 13 (7.7%)           | 8 (7.5%)              | 0.95           |
| 30-day poor functional outcome (mRS 4-5) (n, %)        | 87 (56.9%)          | 55 (55.0%)            | 0.77           |
| <b>90-day poor functional outcome (mRS 4-5) (n, %)</b> | <b>45 (28.8%)</b>   | <b>40 (40.8%)</b>     | <b>0.049</b>   |
| 180-day poor functional outcome (mRS 4-5) (n, %)       | 30 (20.3%)          | 24 (26.1%)            | 0.29           |

**Table V:** Frequency of outcomes of interest, stratified by ethnicity. Statistically significant results are highlighted with bold-font. Frequency of poor functional outcomes is calculated out of survivors only.

| <b>Outcome Variable</b>                          | <b>Latino/ Hispanic (n=43)</b> | <b>Non-Latino/ Hispanic (n=234)</b> | <b>P Value</b> |
|--------------------------------------------------|--------------------------------|-------------------------------------|----------------|
| 30-day mortality (n, %)                          | 3 (6.3%)                       | 16 (6.5%)                           | 0.94           |
| 90-day mortality (n, %)                          | 3 (6.3%)                       | 18 (7.4%)                           | 0.78           |
| 180-day mortality (n, %)                         | 3 (6.3%)                       | 21 (8.6%)                           | 0.59           |
| 30-day poor functional outcome (mRS 4-5) (n, %)  | 23 (59.0%)                     | 119 (55.6%)                         | 0.70           |
| 90-day poor functional outcome (mRS 4-5) (n, %)  | 14 (35.0%)                     | 71 (33.2%)                          | 0.82           |
| 180-day poor functional outcome (mRS 4-5) (n, %) | 12 (30.0%)                     | 42 (21.0%)                          | 0.21           |

**Table VI:** Area under the curve (AUC) values for ROC curves of baseline vs delayed prognostication scores (listed left) for 30, 90, and 180-day mortality and poor functional outcome in **male** patients meeting inclusion criteria. Statistical significance is highlighted using bold-font. P-values are represented in parentheses.

|                                 | Mortality (baseline vs delayed)       |                                            |                                       | Poor Functional Outcome (baseline vs delayed) |                        |                        |
|---------------------------------|---------------------------------------|--------------------------------------------|---------------------------------------|-----------------------------------------------|------------------------|------------------------|
|                                 | 30-day                                | 90-day                                     | 180-day                               | 30-day                                        | 90-day                 | 180-day                |
| Original ICH Score<br>(N = 169) | <b>0.75 vs 0.85</b><br><b>(0.02)</b>  | <b>0.74 vs 0.86</b><br><b>(0.006)</b>      | <b>0.75 vs 0.85</b><br><b>(0.006)</b> | <b>0.64 vs 0.72</b><br><b>(0.01)</b>          | 0.72 vs 0.73<br>(0.65) | 0.81 vs 0.80<br>(0.59) |
| Modified ICH Score<br>(N = 169) | 0.78 vs 0.85<br>(0.095)               | <b>0.76 vs 0.85</b><br><b>(0.035)</b>      | <b>0.74 vs 0.82</b><br><b>(0.037)</b> | <b>0.64 vs 0.72</b><br><b>(0.006)</b>         | 0.71 vs 0.72<br>(0.71) | 0.80 vs 0.78<br>(0.58) |
| Max ICH Score<br>(N = 168)      | <b>0.76 vs 0.86</b><br><b>(0.001)</b> | <b>0.75 vs 0.86</b><br><b>(&lt; 0.001)</b> | <b>0.79 vs 0.87</b><br><b>(0.035)</b> | <b>0.73 vs 0.79</b><br><b>(0.025)</b>         | 0.83 vs 0.80<br>(0.45) | 0.87 vs 0.83<br>(0.17) |
| FUNC Score<br>(N = 169)         | 0.67 vs 0.69<br>(0.44)                | 0.69 vs 0.71<br>(0.44)                     | 0.74 vs 0.75<br>(0.43)                | 0.62 vs 0.63<br>(0.871)                       | 0.69 vs 0.69<br>(0.93) | 0.70 vs 0.70<br>(0.86) |

**Table VII:** Area under the curve (AUC) values for ROC curves of baseline vs delayed prognostication scores (listed left) for 30, 90, and 180-day mortality and poor functional outcome in **female** patients meeting inclusion criteria. Statistical significance is highlighted using bold-font. P-values are represented in parentheses.

|                                 | Mortality (baseline vs delayed)       |                         |                        | Poor Functional Outcome (baseline vs delayed) |                         |                        |
|---------------------------------|---------------------------------------|-------------------------|------------------------|-----------------------------------------------|-------------------------|------------------------|
|                                 | 30-day                                | 90-day                  | 180-day                | 30-day                                        | 90-day                  | 180-day                |
| Original ICH Score<br>(N = 107) | <b>0.72 vs 0.79</b><br><b>(0.019)</b> | 0.73 vs 0.76<br>(0.55)  | 0.71 vs 0.78<br>(0.23) | 0.80 vs 0.77<br>(0.41)                        | 0.76 vs 0.70<br>(0.099) | 0.76 vs 0.72<br>(0.41) |
| Modified ICH Score<br>(N = 107) | <b>0.76 vs 0.80</b><br><b>(0.017)</b> | 0.76 vs 0.76<br>(0.97)  | 0.73 vs 0.77<br>(0.43) | 0.43 vs 0.54<br>(0.96)                        | 0.76 vs 0.74<br>(0.57)  | 0.72 vs 0.73<br>(0.81) |
| Max ICH Score<br>(N = 106)      | <b>0.72 vs 0.79</b><br><b>(0.02)</b>  | 0.72 vs 0.77<br>(0.16)  | 0.75 vs 0.79<br>(0.10) | 0.83 vs 0.86<br>(0.35)                        | 0.85 vs 0.84<br>(0.67)  | 0.83 vs 0.81<br>(0.43) |
| FUNC Score<br>(N = 107)         | <b>0.64 vs 0.85</b><br><b>(0.041)</b> | 0.61 vs 0.78<br>(0.051) | 0.64 vs 0.79<br>(0.06) | 0.65 vs 0.60<br>(0.16)                        | 0.69 vs 0.61<br>(0.051) | 0.65 vs 0.60<br>(0.31) |

**Table VIII:** Area under the curve (AUC) values for ROC curves of baseline vs delayed prognostication scores (listed left) for 30, 90, and 180-day mortality and poor functional outcome in **Latino or Hispanic** patients meeting inclusion criteria. Statistical significance is highlighted using bold-font. P-values are represented in parentheses.

|                    | Mortality (baseline vs delayed) (N = 43) |                         |                         | Poor Functional Outcome (baseline vs delayed) (N = 40) |                         |                        |
|--------------------|------------------------------------------|-------------------------|-------------------------|--------------------------------------------------------|-------------------------|------------------------|
|                    | 30-day                                   | 90-day                  | 180-day                 | 30-day                                                 | 90-day                  | 180-day                |
| Original ICH Score | 0.73 vs 0.77<br>(0.095)                  | 0.73 vs 0.77<br>(0.095) | 0.73 vs 0.77<br>(0.095) | 0.74 vs 0.80<br>(0.11)                                 | 0.88 vs 0.92<br>(0.30)  | 0.93 vs 0.93<br>(0.96) |
| Modified ICH Score | 0.87 vs 0.84<br>(0.71)                   | 0.87 vs 0.84<br>(0.71)  | 0.87 vs 0.84<br>(0.71)  | 0.76 vs 0.83<br>(0.11)                                 | 0.90 vs 0.95<br>(0.26)  | 0.96 vs 0.96<br>(0.85) |
| Max ICH Score      | 0.75 vs 0.85<br>(0.53)                   | 0.75 vs 0.85<br>(0.53)  | 0.75 vs 0.85<br>(0.53)  | 0.82 vs 0.90<br>(0.20)                                 | 0.85 vs 0.95<br>(0.078) | 0.93 vs 0.97<br>(0.36) |
| FUNC Score         | 0.39 vs 0.42<br>(0.60)                   | 0.39 vs 0.42<br>(0.60)  | 0.39 vs 0.42<br>(0.60)  | 0.59 vs 0.64<br>(0.53)                                 | 0.71 vs 0.74<br>(0.82)  | 0.76 vs 0.72<br>(0.78) |

**Table IX:** Area under the curve (AUC) values for ROC curves of baseline vs delayed prognostication scores (listed left) for 30, 90, and 180-day mortality and poor functional outcome in **non-Hispanic or Latino** patients meeting inclusion criteria. Statistical significance is highlighted using bold-font. P-values are represented in parentheses.

|                    | Mortality (baseline vs delayed) (N = 234)   |                                             |                                | Poor Functional Outcome (baseline vs delayed) (N = 200) |                                |                                |
|--------------------|---------------------------------------------|---------------------------------------------|--------------------------------|---------------------------------------------------------|--------------------------------|--------------------------------|
|                    | 30-day                                      | 90-day                                      | 180-day                        | 30-day                                                  | 90-day                         | 180-day                        |
| Original ICH Score | <b>0.74 vs 0.83</b><br>(0.004)              | <b>0.74 vs 0.82</b><br>(0.023)              | <b>0.74 vs 0.83</b><br>(0.008) | 0.71 vs 0.73<br>(0.26)                                  | 0.71 vs 0.68<br>(0.22)         | 0.75 vs 0.73<br>(0.40)         |
| Modified ICH Score | <b>0.75 vs 0.83</b><br>(0.014)              | 0.74 vs 0.81<br>(0.058)                     | <b>0.72 vs 0.79</b><br>(0.025) | 0.70 vs 0.74<br>(0.075)                                 | 0.70 vs 0.69<br>(0.65)         | 0.72 vs 0.71<br>(0.80)         |
| Max ICH Score      | <b>0.74 vs 0.83</b><br>( <b>&lt;0.001</b> ) | <b>0.73 vs 0.82</b><br>( <b>&lt;0.001</b> ) | <b>0.77 vs 0.84</b><br>(0.013) | <b>0.76 vs 0.81</b><br>(0.026)                          | 0.83 vs 0.79<br>(0.088)        | <b>0.84 vs 0.79</b><br>(0.047) |
| FUNC Score         | 0.70 vs 0.80<br>(0.056)                     | 0.69 vs 0.78<br>(0.060)                     | 0.73 vs 0.81<br>(0.062)        | 0.64 vs 0.61<br>(0.12)                                  | <b>0.68 vs 0.64</b><br>(0.024) | 0.69 vs 0.64<br>(0.29)         |
